# Supplementary material
Source: PubMed Central journal article supplement (PMC7157798)
Supplement: NIHMS1577317-supplement-Baseline_Data.pdf [file NIHMS1577317-supplement-Baseline_Data.pdf]

Baseline characteristics of animals in ROSC and No ROSC groups

|                                 | ROSC                       | No ROSC   |
|---------------------------------|----------------------------|-----------|
| <b>MAP (mmHg)</b>               | <b>Mean (SD)</b> 84 (6.8)  | 95 (10)   |
|                                 | <b>95% CI</b> 76, 91       | 84, 107   |
| <b>DBP (mmHg)</b>               | <b>Mean (SD)</b> 80 (11.2) | 82 (6.1)  |
|                                 | <b>95% CI</b> 77, 83       | 80, 83    |
| <b>CPP (mmHg)</b>               | <b>Mean (SD)</b> 75 (12.3) | 73 (5.1)  |
|                                 | <b>95% CI</b> 72, 78       | 72, 74    |
| <b>C-Flow (mL/min)</b>          | <b>Mean (SD)</b> 303 (61)  | 328 (188) |
|                                 | <b>95% CI</b> 287, 319     | 279, 376  |
| <b>PetCO<sub>2</sub> (mmHg)</b> | <b>Mean (SD)</b> 40 (1.9)  | 39 (1.7)  |
|                                 | <b>95% CI</b> 39, 40       | 38, 39    |
| <b>CVP (mmHg)</b>               | <b>Mean (SD)</b> 5.4 (4.1) | 8.6 (1.2) |
|                                 | <b>95% CI</b> 4.3, 6.4     | 8.3, 8.9  |
| <b>Lactate (meq/dL)</b>         | <b>Mean (SD)</b> 1 (0.8)   | 0.5 (0.1) |
|                                 | <b>95% CI</b> 0.1, 2       | 0.4, 0.6  |
| <b>HR (BPM)</b>                 | <b>Mean (SD)</b> 65 (6.1)  | 89 (18.4) |
|                                 | <b>95% CI</b> 58, 72       | 66, 111   |

Baseline characteristics comparing animals achieving ROSC with animals not achieving ROSC. There were no significant differences between the two groups. (ROSC) Return of spontaneous circulation. (MAP) Mean arterial pressure. (DBP) Diastolic blood pressure, (CPP) Coronary perfusion Pressure. (C-Flow) Carotid artery blood flow. (PetCO<sub>2</sub>) End-tidal CO<sub>2</sub>. (CVP) Central venous pressure. (HR) Heart Rate. (SD) Standard deviation. (95% CI) 95% Confidence intervals.
